# Supplementary material
Source: PubMed Central journal article supplement (PMC5494751)
Supplement: JB.00054-17_zjb999094456s1.pdf [file JB.00054-17_zjb999094456s1.pdf]

## SUPPLEMENTARY FIGURES

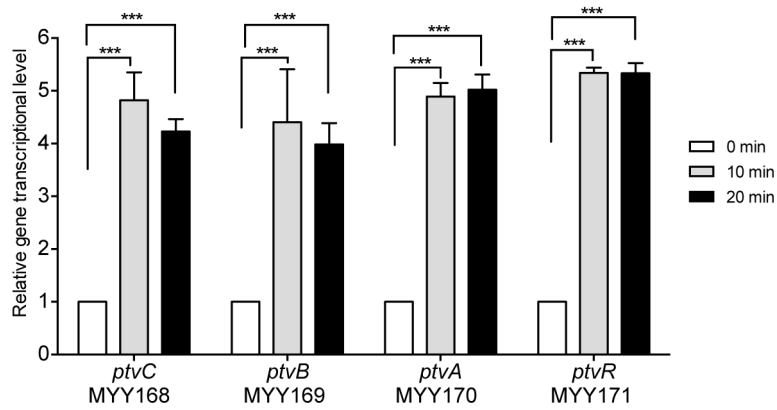

**Figure S1.** The mRNA levels of the *ptv* genes in *S. pneumoniae* ST556 before and after vancomycin treatment as described in Figure 1B. The gene locus MYY171-168 represents *ptvR-C*, respectively.

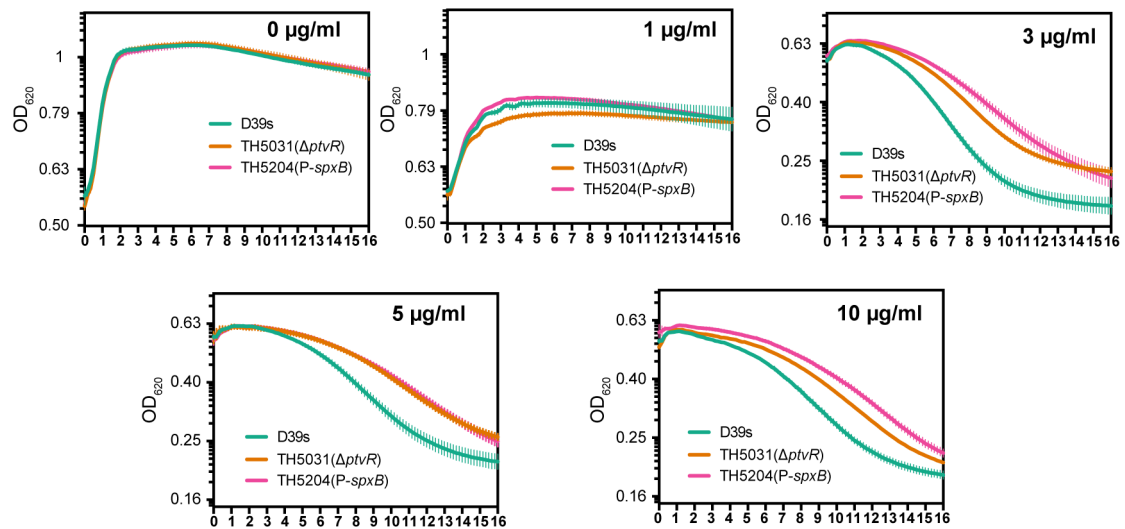

**Figure S2.** Impact of drug concentration on the *ptv*-mediated vancomycin tolerance of *S. pneumoniae*. Pneumococcal strains were processed as described in Fig. 4A, except that different concentrations of vancomycin were used as indicated in each sub-figure.

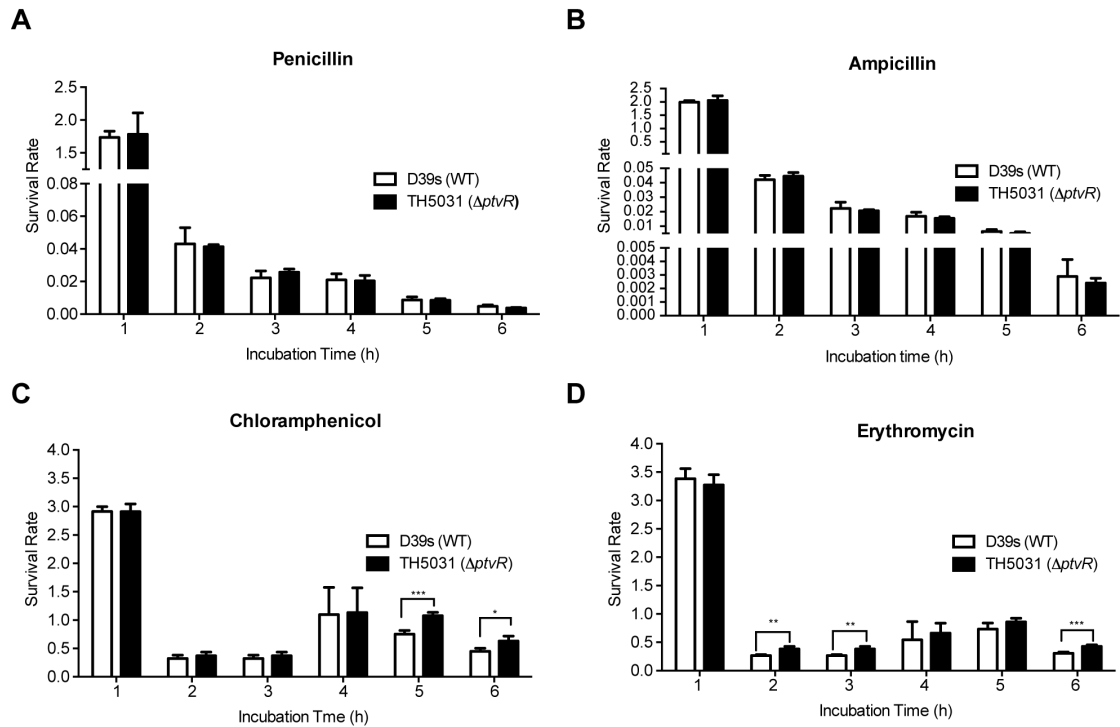

**Figure S3. Impact of the *ptv* operon on pneumococcal tolerance to other antibiotics.** Tolerance of D39s and isogenic *ptvR*-null mutant (TH5031) to penicillin (A) (0.12  $\mu\text{g/ml}$ ), ampicillin (B) (0.5  $\mu\text{g/ml}$ ), chloramphenicol (C) (10  $\mu\text{g/ml}$ ), and erythromycin (D) (0.6  $\mu\text{g/ml}$ ) were determined by mixing each compound with mid-log phase cultures to a final concentration of its 10-fold MIC value. Viable pneumococci were enumerated by colony plating and presented as in Fig. 4B or 4C.

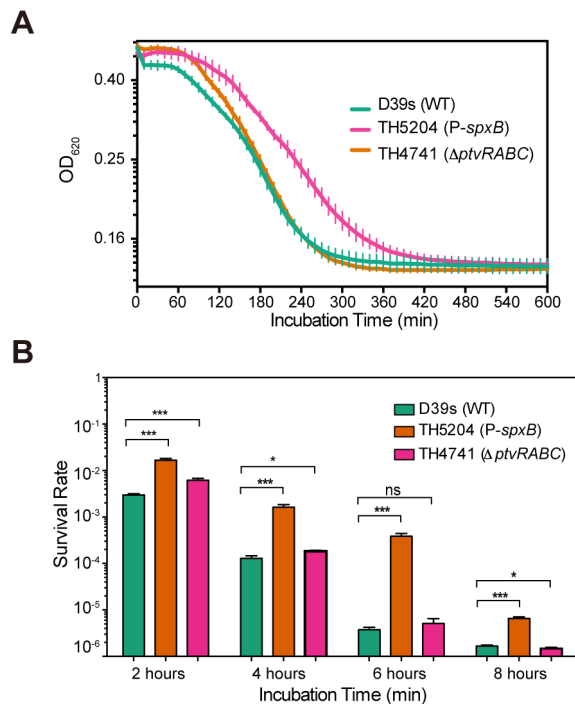

**Figure S4. Impact of pretreatment with a lower dose of vancomycin on the tolerance of wild type *S. pneumoniae* D39 to a lethal concentration of vancomycin.**

**A. Impact of prior treatment with vancomycin on vancomycin tolerance of D39 as assessed by pneumococcal autolysis (culture turbidity).** D39s and its derivatives with insertion of the *spxB* promoter upstream of *ptvR* (TH5204), and deletion of the *ptv* operon (TH4741) were cultured in THY broth to OD<sub>620</sub> 0.4. The cultures were pretreated with 0.5 µg/ml vancomycin for 20 min to induce the expression of the *ptv* operon, and subsequently mixed with vancomycin to a final concentration of 5 µg/ml. The culture turbidity was monitored by spectrophotometry immediately before (0 h) and after addition of vancomycin every 10 minutes for 10 hours.

**B. Impact of prior treatment with vancomycin on vancomycin tolerance of D39 as assessed by bacterial viability.** Pneumococcal strains were processed as in (A) except for plating the cultures on blood agar dishes at various time points before (0 h) and after (1-8 h) the addition of vancomycin. Survival rate represents the CFU ratio of the same cultures before and after addition of vancomycin. Asterisks indicate significant increase of strains TH5204 and TH4741 over D39s in survival rate after vancomycin treatment (\*,  $P < 0.05$ ; \*\*,  $P < 0.01$ ; \*\*\*,  $P < 0.001$ ).

**Supplemental Table S1. The Primers used in this work**

| <b>Primers</b> | <b>Sequence (5'-3')</b>                             |
|----------------|-----------------------------------------------------|
| Pr1097         | GAGATCTAGACCGTTTGATTTTAAATGGATAATG                  |
| Pr1098         | GAGACTCGAGCCTTTCCTTATGCTTTTGGAC                     |
| Pr2773         | ATAGGATCCGGATTCTCATCTTTGGTGTG                       |
| Pr2774         | AGTGAATTCAACGTCTGCTTGGTGTGGA                        |
| Pr3129         | ATAGCGGCCGCACTCAAGGGAAAATTACTGCAT                   |
| Pr3130         | AGTGGCGCGCCGAATAAAGTCTACAAGTTTCATATTGA              |
| Pr3110         | GATCCTCTAGAAGCGGCCCATGGTACCGGGCGCGCCCTCGAGGCTAGCG   |
| Pr3111         | AATTCGCTAGCCTCGAGGGCGCGCCCGGTACCATGGCGGCCGCTTCTAGAG |
| Pr7187         | CACCTACAGCCTCTTCTTCTTGA                             |
| Pr7188         | GAGATCTAGAGGGAAACCTCCTTTTCTAATGT                    |
| Pr7189         | GAGACTCGAGTCATAGAAGGGAGTATCCGCC                     |
| Pr7190         | TGGTAGTCGGAGAATAACTTCTTC                            |
| Pr7195         | TCGCTTCTTCGGTCTACTCA                                |
| Pr7196         | GAGATCTAGAGGTAGAACCTCCTTTTATGTTAGATAAA              |
| Pr7197         | GAGACTCGAGAATTCAATCCTGTCATCCTTGG                    |
| Pr7198         | GCTTGGATCAGGCAGCTACT                                |
| Pr7207         | TCAGTTCTTGTTCATGGCGGGATGTTGGAAAGTACAT               |
| Pr7208         | ATGTACTTCCAACATCCCGCCATGACAAGAAGTGA                 |
| Pr7212         | TTAAAGAAAGGCCAAGATAAACCATCTTGTTCAT                  |
| Pr7213         | ATGAAACAAGAATGGTTTATCTTGGCCTTTCTTTAA                |
| Pr7275         | CAAGGACAGACAAGAATAATACGGCCAAGATGAGAAAT              |
| Pr7276         | ATTTCTCATCTTGGCCGTATTATTCTTGTCTGTCCTTG              |
| Pr7878         | GAGTGTCCATTCATCTTTTAGGGTC                           |
| Pr7879         | TCCTCTGCCTTGATTGAATTTCTC                            |
| Pr7880         | GGAGGGCTAACAAGGCGATATG                              |
| Pr7881         | CGCCATCCTCGTGACCCT                                  |
| Pr7882         | GGTGAGCAGAAAGAGATGGATGG                             |
| Pr7883         | CCAAGTCCATGGTAAGGTTGAACT                            |
| Pr7884         | CTCGCTTCACTGTCTTCAGGAGTT                            |
| Pr7891         | GATACGACTTCCTTCAATTCGGAG                            |
| Pr7893         | CACAACGAAACTACCCAAGAGGAA                            |
| Pr7932         | GATTGCCATCATGAGTGACAAGG                             |
| Pr7933         | AGTGTCCACTTCGCGAAGGGT                               |
| Pr8059         | CTGGTGTGATCGGCATTTCC                                |
| Pr8060         | GAGATCTAGAGGGAAACCTCCTTTTCTAATGTGTAAG               |
| Pr8061         | GAGACTCGAGATGTACTTTCCAACATCCTCTGCC                  |
| Pr8062         | GGGCCGCTTCTTTGGGAGTT                                |
| Pr8064         | TGAAGGAGAGTTATCATTATGTACTTTCCAACATCC                |
| Pr8065         | GGATGTTGGAAAGTACATAATGATAACTCTCCTTCA                |

|         |                                                                                      |
|---------|--------------------------------------------------------------------------------------|
| Pr8121  | GAGACTCGAGGGGAAACCTCCTTTTCTAATGTGTAAG                                                |
| Pr8139  | GAGACTCGAGAAGTAATGACTAGATTTCTTTGTTATAA                                               |
| Pr8171  | GAGACATATGTACTTTCCAACATCCTCT                                                         |
| Pr8172  | GAGACTCGAGGTTCTTGTCATGGC                                                             |
| Pr8201  | CTTGCTCATTCTGTTTTCTGC                                                                |
| Pr8202  | GCACCGATAGCCAGTAAACC                                                                 |
| Pr8203  | GGGATTCTTCATATCGCAAGTA                                                               |
| Pr8513  | GAGATCTAGACATGCGTAAATGGACAAAAGGA                                                     |
| Pr8514  | AGTTCAACCTTACCATGGACTTGG                                                             |
| Pr8515  | ACTCTATACAGACACCATCAATGGCA                                                           |
| Pr8516  | GAGATCTAGATCCTTTTGTCCATTTACGCATG                                                     |
| Pr8517  | GAGACTCGAGATATCCACACCAAGCAGACGTTGA                                                   |
| Pr8518  | TAGCTGCTCAGGGAAGCGAC                                                                 |
| Pr8521  | CGTAAATGGACAAAAGGAATATCCACACCAAGCAGA                                                 |
| Pr8522  | TCTGCTTGGTGTGGATATTCCTTTTGTCCATTTACG                                                 |
| Pr8547  | AGAACTGAATACCTGACTCTCATTGTTCTGTCTGGTA                                                |
| Pr8548  | TACCAGACGAACAATGAGAGTCAGGTATTCAGTTCT                                                 |
| Pr8550  | GAGACTCGAGTCAGTTCTTGTCATGGCGGG                                                       |
| Pr8551  | ACACCGTCATGACCTGGTTACC                                                               |
| Pr10024 | CCCTGCTCCAGTACGGCC                                                                   |
| Pr10025 | CCTTACAGTGGACAGAGCGGATAAG                                                            |
| Pr10379 | GAGAGGGCCCAAGTAATGACTAGATTTCTTTGTTATAAAAC                                            |
| Pr10380 | GACCCGGGTCAGTGGTGGTGGTGGTGGTGGTCTTGTCATGGCGGATAAC                                    |
| Pr10655 | CCTTACAGTGGACAGAGCGGATAAGATCCTTTAAACTTCTAGTTTT                                       |
| Pr10656 | AAAAGTAGAAGTTTAAAGGATCTTATCCGCTCTGTCCACTGTAAAG                                       |
| Pr10657 | AGCTAGAAGTTTTTATATATAAAAATTTTACACAT                                                  |
| Pr10658 | ATGTGTAAAATTTTTATATATAAAAAACTTCTAGCT                                                 |
| Pr10659 | TTCTCTTGACAGGGCTTTCTTTTAGATGTACAATGT                                                 |
| Pr10660 | ACATTGTACATCTAAAAGAAAGCCCTGTCAAGAGAA                                                 |
| Pr10661 | ATGTGTAGAAAATTTATATATAAAAATCTTACACAT                                                 |
| Pr10662 | ATGTGTAAGATTTTTATATATAATTTTTCTACACAT                                                 |
| Pr10663 | TAGAAAAGGAGGTTTCCCATGTACTTTCCAACATCCTCTGCCTTGATTGAATT<br>TCTCATCTTGGCCGTAAGGAGCAGGG  |
| Pr10664 | CCCTGCTCCAGTACGGCCAAGATGAGAAATTCAATCAAGGCAGAGGATGTT<br>GGAAAGTACATGGGAAACCTCCTTTTCTA |
| Pr10379 | GAGAGGGCCCAAGTAATGACTAGATTTCTTTGTTATAAAAC                                            |
| Pr10380 | GACCCGGGTCAGTGGTGGTGGTGGTGGTGGTCTTGTCATGGCGGATAAC                                    |
| Pr10383 | GATTACGCCAAGCTTTAGGGTCAAGAGCTGCTCTATACCACCG                                          |
| Pr12560 | GCATGCGGCCGCTACACATTAGAAAAGGAGGTTTCCC                                                |
| Pr12561 | GCGCACTAGTGTCTTGTCATGGCGGATACTCC                                                     |
| Pr12562 | GCATGCGGCCGCGGCATCATAGAAGGGAGTATCCG                                                  |
| Pr12563 | GCGCACTAGTCGCATGCTGATTACCTCTCTTTC                                                    |

|         |                                               |
|---------|-----------------------------------------------|
| Pr12564 | GCATGCGGCCGCAAAAAAGGAAAGAGAGGTAATCAGCAT       |
| Pr12565 | GCGCACTAGTACGTCTGCTTGGTGTGGATATTAG            |
| Pr12566 | GCATGCGGCCGCATCTAACTAAAAAGGAGGTTCTACCATG      |
| Pr12567 | GCGCACTAGTAAGAAAAGGCCAAGATACGAAGATAA          |
| Pr12568 | GCGCACTAGTTACTTTCCAACATCCTCTGCCTTG            |
| Pr12569 | GCATGCGGCCGCTCAGTTCTTGTCATGGCGGATA            |
| Pr12570 | GCGCACTAGTACAAGAACTGAATACCTGACTCAGCT          |
| Pr12571 | GCATGCGGCCGCTTACGCATGCTGATTACCTCTCTTT         |
| Pr12572 | GCGCACTAGTCGTAAATGGACAAAAGGATTTCTC            |
| Pr12573 | GCATGCGGCCGCTCAACGTCTGCTTGGTGTGGATA           |
| Pr12574 | GCGCACTAGTAAACAAGAATGGTTTGAAAGTAATG           |
| Pr12575 | GCATGCGGCCGCTTAAAGAAAGGCCAAGATACGAAGA         |
| Pr12576 | AATAGCGGCCGCGACAGTTGCGGATGTACTTC              |
| Pr12577 | GCGAATTCGATTAATCAGATCTAATTAGCTGAAGGAGGAATAATG |
| Pr12578 | GGAAGTCTCTCAAGCTGAAGTCG                       |
| Pr12579 | GCATAGATCTTTAAAGAAAGGCCAAGATACGAAG            |
| Pr12580 | GCATGCGGCCGCAATTCATCCTGTCACTTGGC              |
| Pr12581 | AAACGATTTCAAAGGAGTCCAGTT                      |
| Pr12582 | GAGAGAATTCACACATTAGAAAAGGAGGTTTCCC            |
| Pr12583 | GCGCACTAGTGCTGAGTCAGGTATTCAGTTCTTGTC          |
| Pr12584 | AAGTAATGACTAGATTTCTTTGTTATAA                  |
| Pr12585 | AATGATAACTCTCCTTCAATTTTTTTA                   |
| Pr12588 | CCCTGCTCCAGTACGGCC (5' end labeled with Cy3)  |
